# Supplementary material for: Effect of Salinity and Nitrogen Sources on Leaf Quality, Biomass, and Metabolic Responses of Two Ecotypes of <em>Portulaca oleracea</em>
Source: Preprints.org preprint supplement (doi:10.20944/preprints202004.0044.v1), 2020-04-06
Supplement: Supplementary file 1 [file supplementary]

# Supplementary material

Ecotype ET Leaf metabolite changes in response to salt and nitrogen forms

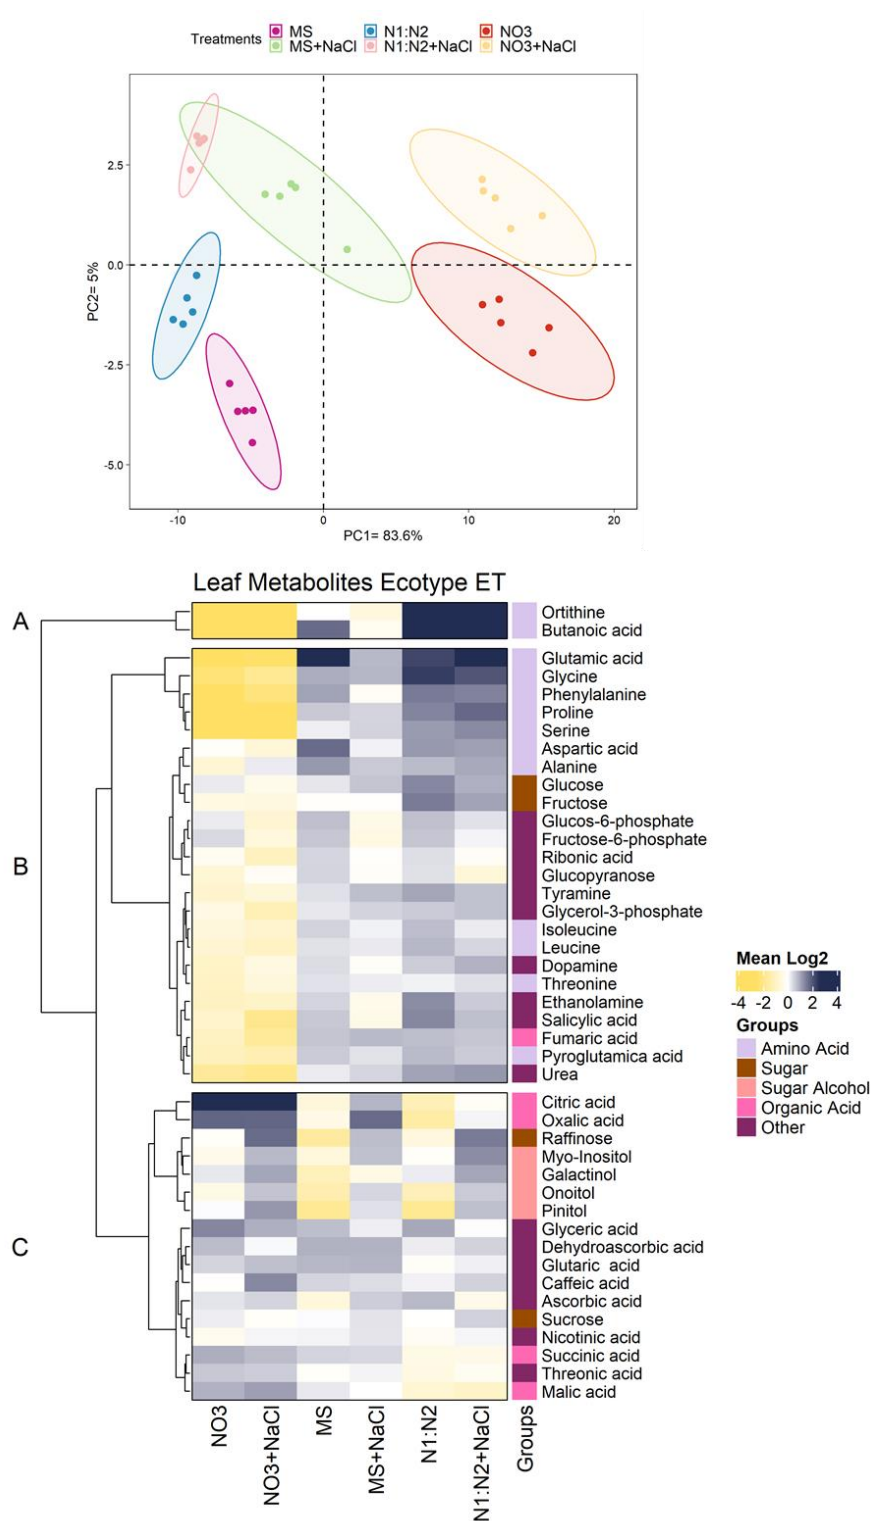

Supplementary Figure 1 (A). PCA plot analysis of leaf metabolomic profile of ecotype ET, each dot represents one biological sample. Treatments were a factorial combination of  $\text{NO}_3^-:\text{NH}_4^+$  ratios

(100:0, 66:33 and 25:75) and two levels of salinity (0, 50 mM NaCl). (B) heat map analysis of GC-MS metabolomics, legend ( $\text{NO}_3=100:0$ ,  $\text{NO}_3+\text{NaCl}$  100:0 + 50 mM NaCl; MS = 66:33, MS+NaCl = 66:33 + 50 mM NaCl ; N1:N2 = 25:75 , N1:N2+NaCl = 25:75 + 50 mM NaCl. The rows show metabolites and the columns represent the samples. Metabolites that were significantly decreased are displayed dark blue, while metabolites that were significantly increased are displayed yellow.

# Ecotype RN Leaf metabolite changes in response to salt and nitrogen forms

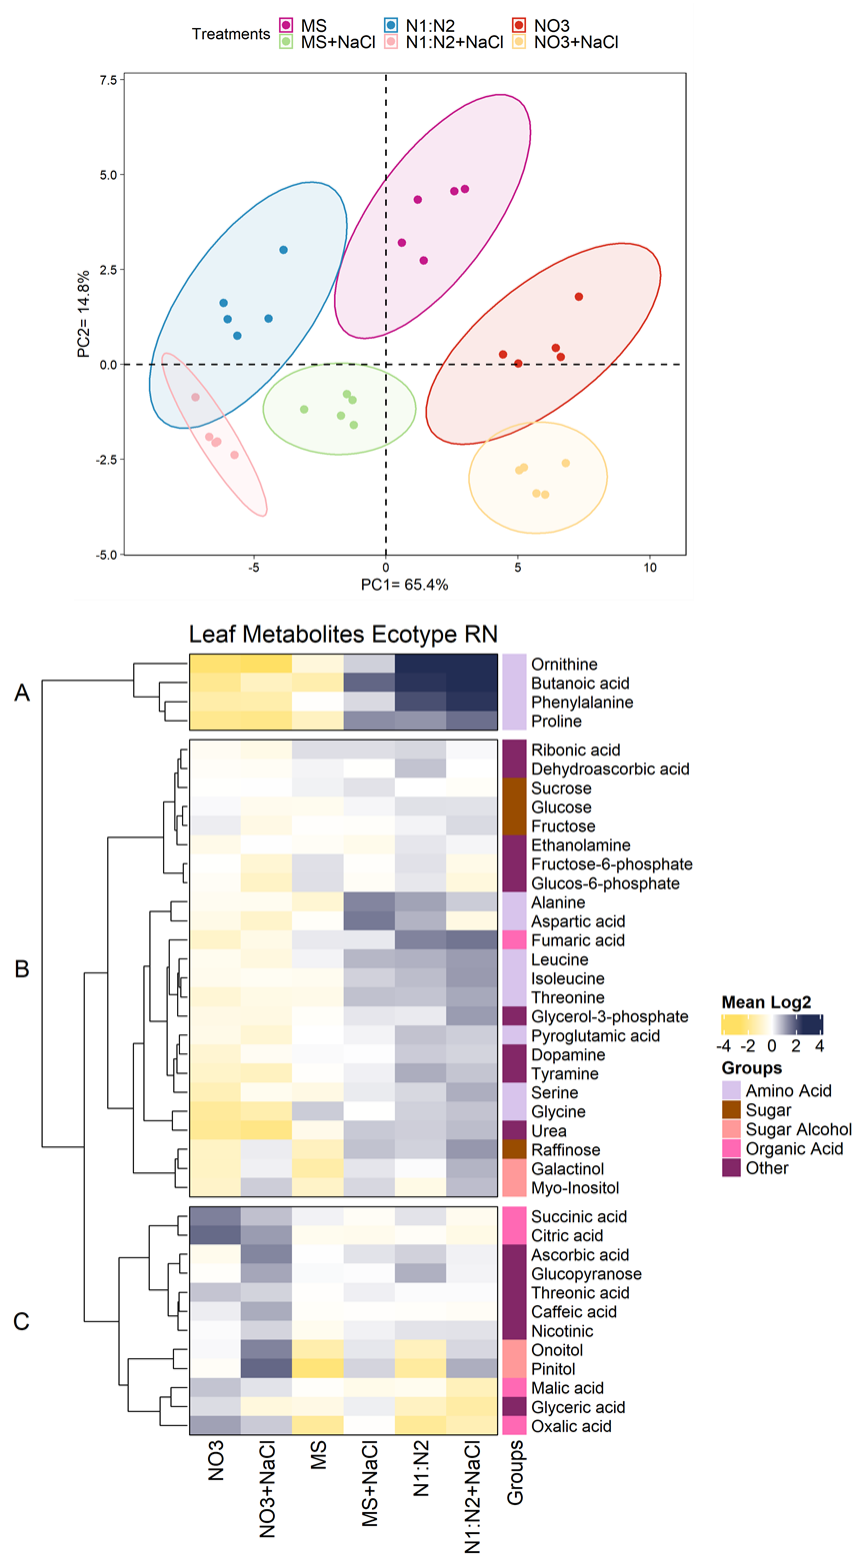

Supplementary Figure 2 (A). PCA plot analysis of leaf metabolomic profile of ecotype RN, each dot represents one biological sample. Treatments were a factorial combination of  $\text{NO}_3^-:\text{NH}_4^+$  ratios

(100:0, 66:33 and 25:75) and two levels of salinity (0, 50 mM NaCl). (B) heat map analysis of GC-MS metabolomics, legend ( $\text{NO}_3=100:0$ ,  $\text{NO}_3+\text{NaCl}$  100:0 + 50 mM NaCl; MS = 66:33, MS+NaCl = 66:33 + 50 mM NaCl ; N1:N2 = 25:75 , N1:N2+NaCl = 25:75 + 50 mM NaCl. The rows show metabolites and the columns represent the samples. Metabolites that were significantly decreased are displayed dark blue, while metabolites that were significantly increased are displayed yellow.
